# Supplementary material for: Human auditory ossicles as an alternative optimal source of ancient DNA
Source: HighWire-hosted journal article supplement (doi:10.1101/gr.260141.119), 2020-02-25
Supplement: Supplemental_References_.docx [file Supplemental_References_.docx]

**Supplemental References**

Adams WY, Van Gerven DP, Guise D. 1999. *Kulubnarti III: The Cemeteries*. Archaeopress, Oxford.

Anders A. 2017. “Emberek az újkőkorban: Polgár környéki neolitikus temetkezések bioszociális feldolgozásának első eredményei [People from the Neolithic: first results of the biosocialarchaeological investigations on Neolithic burials of the Polgár micro region].” PhD thesis, Eötvös Loránd University, Budapest.

Anders A, Nagy EG. 2007. Late Neolithic burial rites at the site of Polgár-Csőszhalom-dűlő. In *The Lengyel, Polgár and related cultures in the Middle/Late Neolithic in Central Europe* (ed. Kozłowski JK, Raczky P), pp. 83–96. Polish Academy of Arts and Sciences, Kraków, Poland.

Bartík J, Šefčáková A. 2004. Hrob so šálkou protoúnětickej kultúry z Blatného, okr. Bratislava-vidiek, Slovensko (A grave with a cup of Proto Únětice Culture from Blatné, Greater city of Bratislava, Slovakia). In *Zborník K poctě Vladimíru Podborskému [Proceedings to Honor Vladimír Podborský]* (ed. Kazdová E, Měřínský Z, Šabatová K), pp. 235–244. FF Masaryk University in Brno, Brno, Czech Republic.

Canci A, Contursi D, Fornaciari G. 2005. La necropoli dell’età del bronzo di Olmo di Nogara (Verona): primi risultati dello studio paleopatologico. In *La necropoli dell’età del Bronzo all’Olmo di Nogara*, Memorie del Museo Civico di Storia Naturale di Verona (ed. Luciano S), Vol. 8, pp. 495–501. Museo civico di storia naturale, Verona.

Coppa A, Damadio S. 2005. Palaeobiology of the populations of Yemen. In *South Arabian Necropolises. Italian Excavations at Al- Makhdarah and Kharabit al-Ahjur (Republic of Yemen)* (ed. de Maigret A, Antonini S), pp. 91–146. Istituto Italiano per l’Africa e l’Oriente, Centro Studi e Scavi Archeologici, Rome.

Corrain C, Capitanio M, Pesarin F. 1975. Confronto statistico tra le serie osteologiche delle stazioni eneolitiche di Buccino e di Madonna della Catena (Salerno). In *Atti della XVII Riunione Scientifica dell’Istituto Italiano di Preistoria e Protostoria* (ed. Cesnola AP, et al.), pp. 187–197. Istituto italiano di preistoria e protoistoria, Florence, Italy.

Farkaš Z. 2002. Nálezy ľudských pozostatkov v prostredí kultúry ľudu s lineárnou keramikou na Slovensku [Human remains from the Linear Pottery Culture area in Slovakia]. *Archeologické Rozhledy* **54:** 23–43.

Gromov AV. 1995. Bronze Age population of the Southern Khakassia and problem of the origin of the Karasuk culture. In *Antropologia segodnya* (ed. Gokhman II), Vol. 1, pp. 130–150. MAE RAS, Saint-Petersburg.

Haas N, Maximilian K. 1958. Anthropological study of the human bones from graves with ochre from Glăvăneștii Vechi, Corlăteni and Stoicani Cetățuie. *Soviet Anthropology* **4:** 133–146.

Helm R, Allison E, Anderson I, Barber L, Broadley R, Carruthers W, Locker A, Lyne M, McIntyre L, McNee B, Richardson A, Smith I, Wilson T. 2017. *Former Peugeot Garage, Rhodaus Town (A28), Canterbury, Kent CT1 2RH. Post-excavation assessment, client report no. 2017/107*. Canterbury Archaeological Trust, Canterbury, UK.

Okumura M. 2007. “Diversidade morfológica craniana, micro-evolução e ocupação pré-histórica da costa brasileira.” PhD thesis, Institute of Biosciences, University of São Paulo, São Paulo.

Passarello P, Macchiarelli R. 1987. La necropoli protostorica di Kātelai (Swāt, Pakistan). Analisi antropologica del materiale scheletrico con riferimento al contesto paleobiologico umano dell’area medio-orientale. *Rivista di Antropologia* **65:** 5–104.

Pietrusewsky M, Douglas MT. 2002. *Ban chiang, a prehistoric village site in Northeast Thailand. Volume I: the human skeletal remains*. University Museum Monograph 111. University of Pennsylvania Museum of Archaeology and Anthropology, Philadelphia.

Pulcini ML. 2014. “La necropoli di Olmo di Nogara (Verona). Studio paleobiologico dei resti umani per la ricostruzione dell’organizzazione di una comunità dell’Età del bronzo padana.” PhD thesis, Dipartimento dei Beni Culturali: Archeologia, Storia dell’Arte, del Cinema e della Musica, Università Degli Studi di Padova, Padua, Italy.

Raczky P. 2018. A complex monument in the making at the Late Neolithic site of Polgár-Csőszhalom. In *Across the Mediterranean–along the Nile. Studies in Egyptology, Nubiology and Late Antiquity Dedicated to László Török on the Occasion of His 75th Birthday* (ed. Bács TA, et al.), pp. 15–60. Institute of Archaeology, Research Centre for the Humanities Hungarian Academy of Sciences, Budapest.

Schmitz PI, Bittencourt ALV. 1996. O sítio arqueológico de Laranjeiras I, S.C. *Pesquisas (Antropologia)* **53:** 13–76.

Szőke BM. 2008. Pannonien in der Karolingerzeit Bemerkungen zur Chronologie des frühmittelalterlichen Fundmaterials in Westungarn. *Schild von Steier Beiheft* **4:** 41–56.

Szőke BM. 2010. Mosaburg/Zalavár und Pannonien in der Karolingerzeit. *Antæus: Communications ex Instituto Archaeological Academiae Scientarum Hungaricae* **31:** 9–52.

Szőke BM. 2014. *The carolingian age in the carpathian basin: permanent exhibition of the Hungarian National Museum*. Magyar Nemzeti Múzeum, Budapest.

Vasilyev SV, Gerasimova MM, Borutskaya SB, Frizen SY, Zamballarova ED. 2010. Anthropological study of the Fofonovo burial (Transbaikalia) Neolithic and early bronze age. *Herald of Anthropology* **18:** 113–127.
